# Supplementary material for: A Diguanylate Cyclase Acts as a Cell Division Inhibitor in a Two-Step Response to Reductive and Envelope Stresses
Source: PubMed Central journal article supplement (PMC4992967; doi:10.1128/mbio.00822-16), 2016-08-09

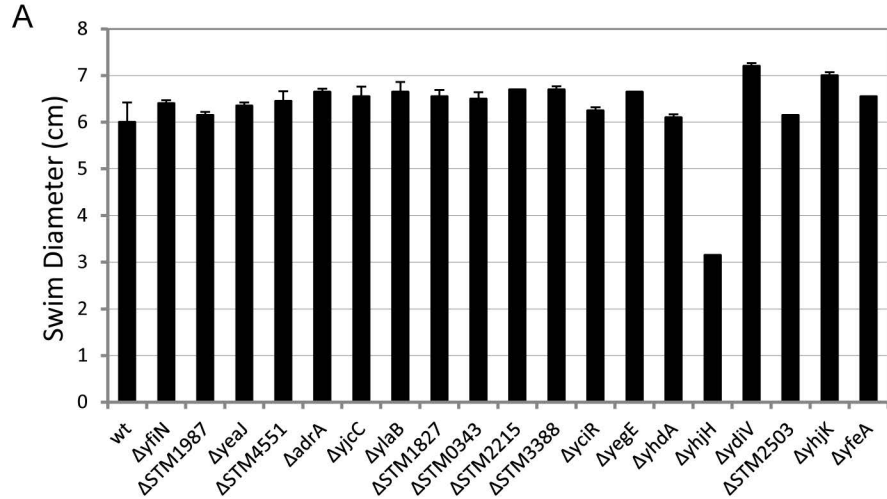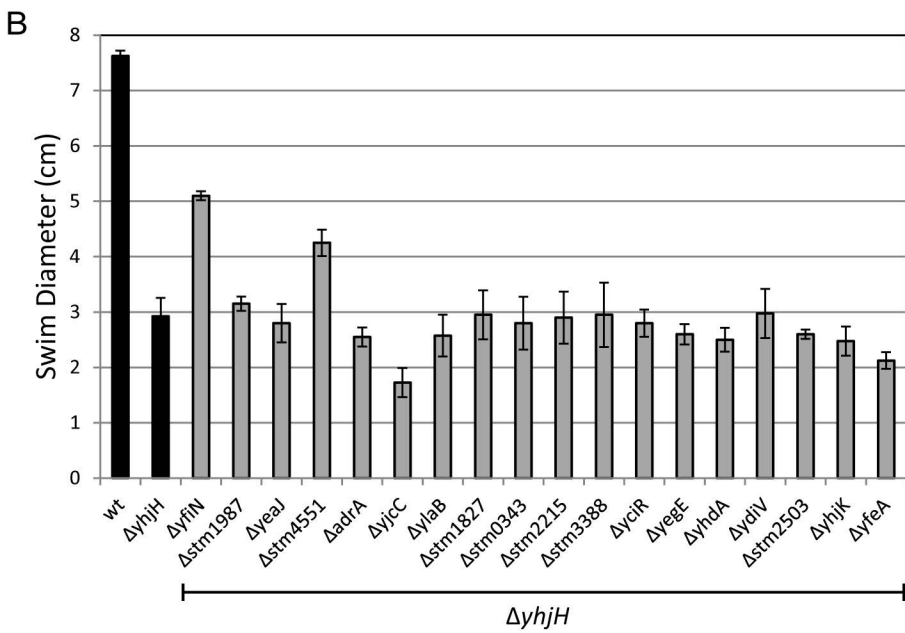

Supplement: mbo004162924sf1.pdf [file mbo004162924sf1.pdf]
