# Supplementary material for: A Diguanylate Cyclase Acts as a Cell Division Inhibitor in a Two-Step Response to Reductive and Envelope Stresses
Source: PubMed Central journal article supplement (PMC4992967; doi:10.1128/mbio.00822-16), 2016-08-09

A

14028  $\Delta yfiN$ 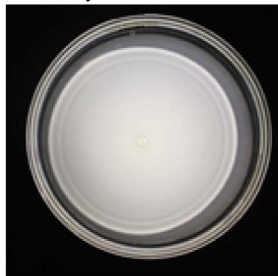14028  $\Delta yfiN$   
pBAD30-<sup>S</sup>YfiN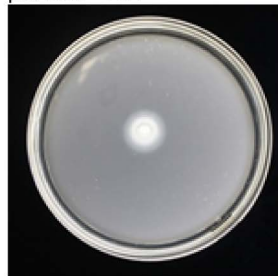14028  $\Delta yfiN$   
pBAD30-<sup>S</sup>YfiN<sub>GFP</sub>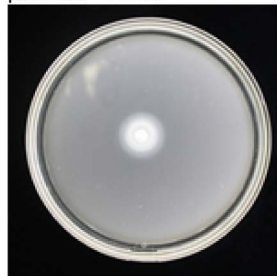14028  $\Delta yfiN$   
pBAD30-<sup>S</sup>YfiN(GGAAF)<sub>GFP</sub>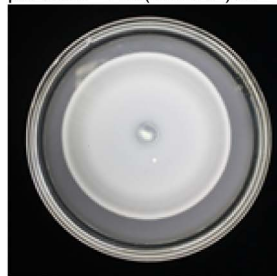

B

MG1655  $\Delta yfiN$ 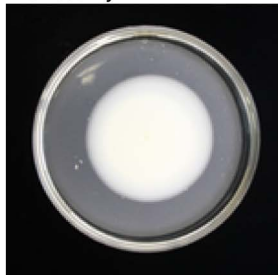MG1655  $\Delta yfiN$   
pBAD30-<sup>E</sup>YfiN<sub>GFP</sub>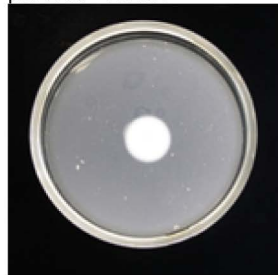MG1655  $\Delta yfiN$   
pBAD30-<sup>P</sup>YfiN<sub>GFP</sub>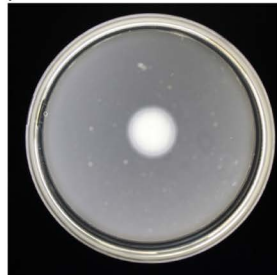MG1655  $\Delta yfiN$   
pTrc99a-DgcA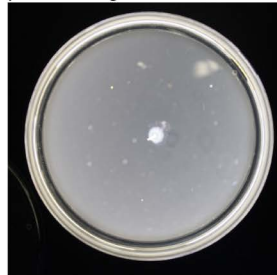

Supplement: mbo004162924sf2.pdf [file mbo004162924sf2.pdf]
