# Supplementary material for: A Diguanylate Cyclase Acts as a Cell Division Inhibitor in a Two-Step Response to Reductive and Envelope Stresses
Source: PubMed Central journal article supplement (PMC4992967; doi:10.1128/mbio.00822-16), 2016-08-09

A

no A22

After 1 hr of A22 treatment

After 2 hrs of A22 treatment

Phase

<sup>S</sup>YfiN<sub>GFP</sub>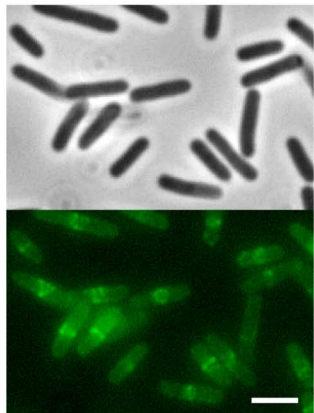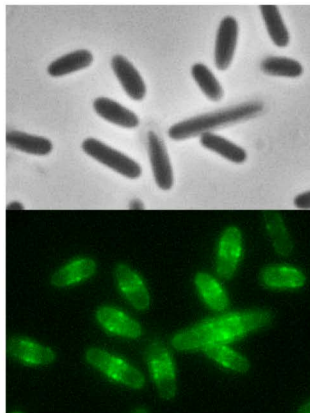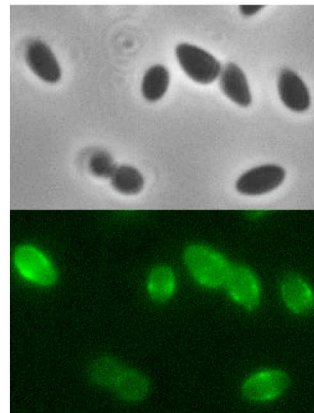

B

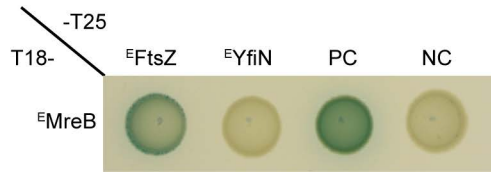

Supplement: mbo004162924sf3.pdf [file mbo004162924sf3.pdf]
