# Supplementary material for: A Diguanylate Cyclase Acts as a Cell Division Inhibitor in a Two-Step Response to Reductive and Envelope Stresses
Source: PubMed Central journal article supplement (PMC4992967; doi:10.1128/mbio.00822-16), 2016-08-09

No stress

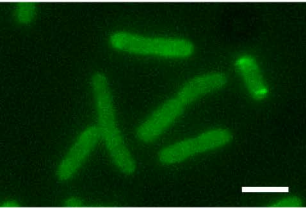

EYfiNGFP

NaCl stress

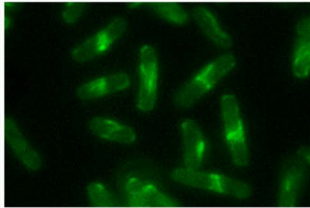

NaCl stress  
in the presence of CM

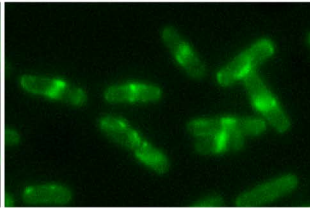

Supplement: mbo004162924sf5.pdf [file mbo004162924sf5.pdf]
