# Supplementary material for: A Diguanylate Cyclase Acts as a Cell Division Inhibitor in a Two-Step Response to Reductive and Envelope Stresses
Source: PubMed Central journal article supplement (PMC4992967; doi:10.1128/mbio.00822-16), 2016-08-09

wild type

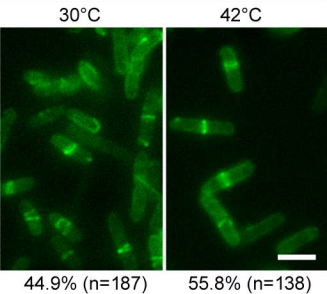

*ftsZts*

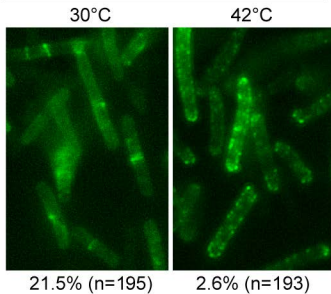

*ftsAts*

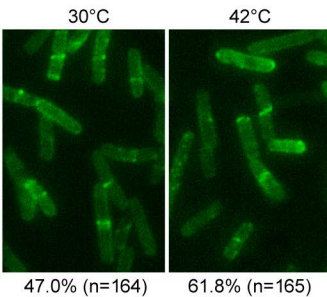

*zipAts*

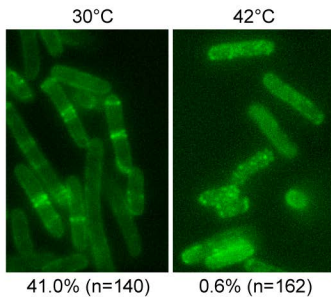

Supplement: mbo004162924sf6.pdf [file mbo004162924sf6.pdf]
