# Supplementary material for: A Diguanylate Cyclase Acts as a Cell Division Inhibitor in a Two-Step Response to Reductive and Envelope Stresses
Source: PubMed Central journal article supplement (PMC4992967; doi:10.1128/mbio.00822-16), 2016-08-09

$P^{YfiN_{GFP}}$   
in *Salmonella*

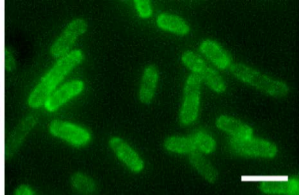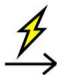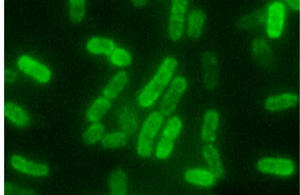

$P^{YfiN_{GFP}}$   
in *E. coli*

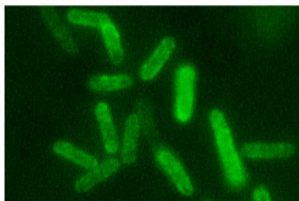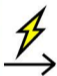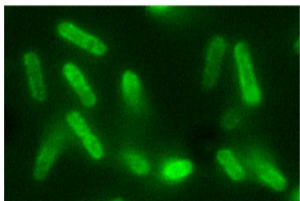

$P^{YfiN_{GFP}}$   
in *P. aeruginosa*

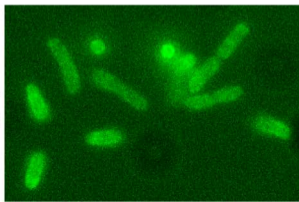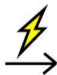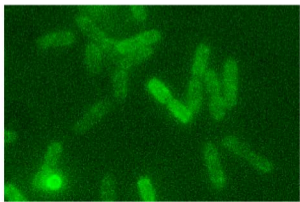

Supplement: mbo004162924sf7.pdf [file mbo004162924sf7.pdf]
