# Supplementary material for: A Diguanylate Cyclase Acts as a Cell Division Inhibitor in a Two-Step Response to Reductive and Envelope Stresses
Source: PubMed Central journal article supplement (PMC4992967; doi:10.1128/mbio.00822-16), 2016-08-09
Supplement: mbo004162924st1.pdf [file mbo004162924st1.pdf]

**Table S1. Strains, Plasmids and Phage**

| Strain, Plasmid, Phage | Genotype or Description                                                                | Reference  |
|------------------------|----------------------------------------------------------------------------------------|------------|
| <i>S. enterica</i>     |                                                                                        |            |
| 14028                  | wild type ATCC strain                                                                  | (1)        |
| HK132                  | $\Delta yfiN$ ; 14028 with deletion of <i>yfiN</i>                                     | This study |
| QW262                  | $\Delta yhjH$                                                                          | (2)        |
| HK133                  | $\Delta STM1987$                                                                       | This study |
| HK134                  | $\Delta yeaJ$                                                                          | This study |
| HK135                  | $\Delta STM4551$                                                                       | This study |
| HK136                  | $\Delta adrA$                                                                          | This study |
| HK137                  | $\Delta yjcC$                                                                          | This study |
| HK138                  | $\Delta ylaB$                                                                          | This study |
| HK139                  | $\Delta STM1827$                                                                       | This study |
| HK140                  | $\Delta STM0343$                                                                       | This study |
| HK141                  | $\Delta STM2215$                                                                       | This study |
| HK142                  | $\Delta STM3388$                                                                       | This study |
| HK143                  | $\Delta yciR$                                                                          | This study |
| HK144                  | $\Delta yegE$                                                                          | This study |
| HK145                  | $\Delta yhdA$                                                                          | This study |
| HK147                  | $\Delta ydiV$                                                                          | This study |
| HK148                  | $\Delta STM2503$                                                                       | This study |
| HK149                  | $\Delta yhjK$                                                                          | This study |
| HK150                  | $\Delta yfeA$                                                                          | This study |
| HK164                  | $\Delta yhjH \Delta yfiN$ ; 14028 with double deletions of <i>yhjH</i> and <i>yfiN</i> | This study |
| HK165                  | $\Delta yhjH \Delta STM1987$                                                           | This study |
| HK166                  | $\Delta yhjH \Delta yeaJ$                                                              | This study |
| HK167                  | $\Delta yhjH \Delta STM4551$                                                           | This study |
| HK168                  | $\Delta yhjH \Delta adrA$                                                              | This study |
| HK169                  | $\Delta yhjH \Delta yjcC$                                                              | This study |
| HK170                  | $\Delta yhjH \Delta ylaB$                                                              | This study |
| HK171                  | $\Delta yhjH \Delta STM1827$                                                           | This study |
| HK172                  | $\Delta yhjH \Delta STM0343$                                                           | This study |
| HK173                  | $\Delta yhjH \Delta STM2215$                                                           | This study |
| HK174                  | $\Delta yhjH \Delta STM3388$                                                           | This study |
| HK175                  | $\Delta yhjH \Delta yciR$                                                              | This study |
| HK176                  | $\Delta yhjH \Delta yegE$                                                              | This study |
| HK177                  | $\Delta yhjH \Delta yhdA$                                                              | This study |
| HK178                  | $\Delta yhjH \Delta ydiV$                                                              | This study |
| HK179                  | $\Delta yhjH \Delta STM2503$                                                           | This study |
| HK180                  | $\Delta yhjH \Delta yhjK$                                                              | This study |
| HK181                  | $\Delta yhjH \Delta yfeA$                                                              | This study |
| HK185                  | HK164 + pBAD30                                                                         | This study |
| HK186                  | HK164 + pBAD30- <sup>S</sup> YfiN                                                      | This study |
| HK187                  | HK164 + pBAD30- <sup>S</sup> YfiN(GGAAF; active site mutant)                           | This study |
| HK261                  | HK132 + pBAD30- <sup>S</sup> YfiN <sub>GFP</sub>                                       | This study |
| HK620                  | HK132 + pBAD33- <sup>S</sup> YfiN(GGAAF) <sub>GFP</sub>                                | This study |

|                       |                                                                                                                                                                                                    |                       |
|-----------------------|----------------------------------------------------------------------------------------------------------------------------------------------------------------------------------------------------|-----------------------|
| HK435                 | HK132 + pBAD30- <sup>S</sup> YfiN                                                                                                                                                                  | This study            |
| HK269                 | HK132 + pBAD30-DgcA                                                                                                                                                                                | This study            |
| HK375                 | HK132 + pBAD33- <sup>S</sup> YfiN <sub>YFP</sub> + pBAD30- <sup>S</sup> FtsA <sub>CFP</sub>                                                                                                        | This study            |
| HK373                 | HK261 + pBAD33                                                                                                                                                                                     | This study            |
| HK372                 | HK261 + pBAD33- <sup>S</sup> SulA                                                                                                                                                                  | This study            |
| HK683                 | HK132 + pBAD33- <sup>S</sup> YfiN <sub>YFP</sub> + pBAD30- <sub>CFP</sub> <sup>S</sup> FtsN                                                                                                        | This study            |
| HK369                 | HK132 + pBAD33- <sup>S</sup> YfiN <sub>YFP</sub>                                                                                                                                                   | This study            |
| HK377                 | HK132 + pBAD30- <sup>P</sup> YfiN <sub>GFP</sub>                                                                                                                                                   | This study            |
| HK698                 | 14028 + pBAD33- <sup>S</sup> SulA                                                                                                                                                                  | This study            |
| HK631                 | 14028 + pBAD30- <sup>S</sup> YfiN <sub>GFP</sub>                                                                                                                                                   | This study            |
|                       |                                                                                                                                                                                                    |                       |
| <b><i>E. coli</i></b> |                                                                                                                                                                                                    |                       |
| MG1655                | K12 wild type strain: F <sup>-</sup> , λ <sup>-</sup> , <i>rph-1</i>                                                                                                                               | Laboratory Collection |
| HK359                 | Δ <i>yfiN</i> ; MG1655 with deletion of <i>yfiN</i>                                                                                                                                                | This study            |
| HK360                 | Δ <i>yfiB</i> ; MG1655 with deletion of <i>yfiB</i>                                                                                                                                                | This study            |
| HK361                 | Δ <i>yfiR</i> ; MG1655 with deletion of <i>yfiR</i>                                                                                                                                                | This study            |
| WM1125                | MG1655 <i>lacU169 ftsZ84</i>                                                                                                                                                                       | (3)                   |
| WM1115                | MG1655 <i>lacU169 ftsA12</i>                                                                                                                                                                       | (4)                   |
| PS223                 | W3110 <i>zipA1</i>                                                                                                                                                                                 | (5)                   |
| JW3832                | BW25113 <i>dsbA::kan</i>                                                                                                                                                                           | (6)                   |
| BTH101                | F <sup>-</sup> , <i>cya-99</i> , <i>araD139</i> , <i>galE15</i> , <i>galK16</i> , <i>rpsL1</i> , <i>hsdR2</i> , <i>mcrA1</i> , <i>mcrB1</i>                                                        | (7)                   |
| XL1-blue              | <i>RecA1</i> , <i>endA1</i> , <i>gyrA96</i> , <i>thi-1</i> , <i>hsdR17</i> , <i>supE44</i> , <i>relA1</i> , <i>lac</i> , [F <sup>'</sup> , <i>proAB</i> , <i>lacIqZΔM15</i> , <i>Tn10 (tet')</i> ] | Stratagene            |
| HK365                 | HK359 + pBAD30- <sup>E</sup> YfiN <sub>GFP</sub>                                                                                                                                                   | This study            |
| HK366                 | HK360 + pBAD30- <sup>E</sup> YfiN <sub>GFP</sub>                                                                                                                                                   | This study            |
| HK549                 | HK359 + pBAD33- <sup>E</sup> YfiN <sub>GFP</sub>                                                                                                                                                   | This study            |
| HK489                 | MG1655 <i>yfiN::<sup>E</sup>yfiN-gfp</i>                                                                                                                                                           | This study            |
| HK531                 | MG1655 <i>yfiR::kan</i> (←)                                                                                                                                                                        | This study            |
| HK532                 | MG1655 <i>yfiR::kan</i> (←) <i>yfiN::P<sub>BAD</sub>-<sup>E</sup>yfiN-gfp</i>                                                                                                                      | This study            |
| HK604                 | MG1655 + pBAD30-DgcA                                                                                                                                                                               | This study            |
| HK635                 | MG1655 + pBAD30- <sup>E</sup> YfiN <sub>GFP</sub>                                                                                                                                                  | This study            |
| HK381                 | WM1125 + pBAD30- <sup>E</sup> YfiN <sub>GFP</sub>                                                                                                                                                  | This study            |
| HK380                 | WM1115 + pBAD30- <sup>E</sup> YfiN <sub>GFP</sub>                                                                                                                                                  | This study            |
| HK590                 | PS223 + pBAD30- <sup>E</sup> YfiN <sub>GFP</sub>                                                                                                                                                   | This study            |
| HK470                 | BTH101 + pUT18 + pKNT25                                                                                                                                                                            | This study            |
| HK469                 | BTH101 + pUT18- <i>zip</i> + pKNT25- <i>zip</i>                                                                                                                                                    | This study            |
| HK597                 | BTH101 + pUT18- <sup>E</sup> YfiN + pKNT25- <sup>E</sup> YfiN                                                                                                                                      | This study            |
| HK598                 | BTH101 + pUT18- <sup>E</sup> YfiN + pKNT25- <sup>E</sup> FtsZ                                                                                                                                      | This study            |
| HK599                 | BTH101 + pUT18- <sup>E</sup> YfiN + pKNT25- <sup>E</sup> FtsA                                                                                                                                      | This study            |
| HK600                 | BTH101 + pUT18- <sup>E</sup> YfiN + pKNT25- <sup>E</sup> ZipA                                                                                                                                      | This study            |
| HK725                 | BTH101 + pUT18C- <sup>E</sup> MreB + pKNT25- <sup>E</sup> FtsZ                                                                                                                                     | This study            |
| HK726                 | BTH101 + pUT18C- <sup>E</sup> MreB + pKNT25- <sup>E</sup> YfiN                                                                                                                                     | This study            |
| HK636                 | HK359 + pBAD30- <sup>P</sup> YfiN <sub>GFP</sub>                                                                                                                                                   | This study            |
| HK571                 | HK359 + pBAD33- <sup>E</sup> YfiN(GGAAF) <sub>GFP</sub> + pTrc99A                                                                                                                                  | This study            |
| HK572                 | HK359 + pBAD33- <sup>E</sup> YfiN(GGAAF) <sub>GFP</sub> + pTrc99A-DgcA                                                                                                                             | This study            |

|                                                 |                                                                                    |                       |
|-------------------------------------------------|------------------------------------------------------------------------------------|-----------------------|
| HK580                                           | BTH101 + pBAD33 + pUT18- <sup>E</sup> YfiN(GGAAF) + pKNT25- <sup>E</sup> FtsZ      | This study            |
| HK582                                           | BTH101 + pBAD33 + pUT18- <sup>E</sup> YfiN(GGAAF) + pKNT25                         | This study            |
| HK576                                           | BTH101 + pBAD33-DgcA + pUT18- <sup>E</sup> YfiN(GGAAF) + pKNT25- <sup>E</sup> FtsZ | This study            |
| HK578                                           | BTH101 + pBAD33-DgcA + pUT18- <sup>E</sup> YfiN(GGAAF) + pKNT25                    | This study            |
| HK608                                           | BTH101 + pBAD33 + pUT18- <sup>E</sup> YfiN(GGAAF) + pKNT25- <sup>E</sup> ZipA      | This study            |
| HK609                                           | BTH101 + pBAD33 + pUT18- <sup>E</sup> YfiN(GGAAF) + pKNT25                         | This study            |
| HK606                                           | BTH101 + pBAD33-DgcA + pUT18- <sup>E</sup> YfiN(GGAAF) + pKNT25- <sup>E</sup> ZipA | This study            |
| HK607                                           | BTH101 + pBAD33-DgcA + pUT18- <sup>E</sup> YfiN(GGAAF) + pKNT25                    | This study            |
| HK551                                           | HK359 + pBAD33- <sup>E</sup> YfiN <sub>GFP</sub> + pTrc99A                         | This study            |
| HK552                                           | HK359 + pBAD33- <sup>E</sup> YfiN <sub>GFP</sub> + pTrc99A- <sup>E</sup> YfiR      | This study            |
| HK367                                           | HK361 + pBAD30- <sup>E</sup> YfiN <sub>GFP</sub>                                   | This study            |
| HK626                                           | JW3832 + pBAD33- <sup>E</sup> YfiN <sub>GFP</sub> + pTrc99A- <sup>E</sup> YfiR     | This study            |
|                                                 |                                                                                    |                       |
| <b><i>P. aeruginosa</i></b>                     |                                                                                    |                       |
| PAO1                                            | PAO1 wild type                                                                     | gift from M. Whiteley |
| HK376                                           | PAO1 + pJN105- <sup>P</sup> YfiN <sub>GFP</sub>                                    | This study            |
|                                                 |                                                                                    |                       |
| <b>Plasmid</b>                                  |                                                                                    |                       |
| pKD4                                            | Kanamycin resistance gene template                                                 | (8)                   |
| pKD46                                           | λ Red Recombinase                                                                  | (8)                   |
| pCP20                                           | FLP recombinase                                                                    | (8)                   |
| pBAD30                                          | Cloning vector; P <sub>BAD</sub> and Amp <sup>R</sup>                              | (9)                   |
| pBAD33                                          | Cloning vector; P <sub>BAD</sub> and Cm <sup>R</sup>                               | (9)                   |
| pTrc99A                                         | Cloning vector; P <sub>Trc</sub> and Amp <sup>R</sup>                              | (10)                  |
| pJN105                                          | Cloning vector; P <sub>BAD</sub> and Gm <sup>R</sup>                               | (11)                  |
| pAB551                                          | P <sub>BAD</sub> :: <i>dgcA</i> from <i>C. crescentus</i>                          | (12)                  |
| pBAD30- <sup>S</sup> YfiN                       | P <sub>BAD</sub> :: <sup>S</sup> <i>yfiN</i>                                       | This study            |
| pBAD30- <sup>S</sup> YfiN(GGAAF)                | P <sub>BAD</sub> :: <sup>S</sup> <i>yfiN</i> (D327A E328A)                         | This study            |
| pBAD30- <sup>S</sup> YfiN <sub>GFP</sub>        | P <sub>BAD</sub> :: <sup>S</sup> <i>yfiN-gfp</i>                                   | This study            |
| pBAD33- <sup>S</sup> YfiN(GGAAF) <sub>GFP</sub> | P <sub>BAD</sub> :: <sup>S</sup> <i>yfiN</i> (D327A E328A)- <i>gfp</i>             | This study            |
| pBAD33- <sup>S</sup> YfiN <sub>YFP</sub>        | P <sub>BAD</sub> :: <sup>S</sup> <i>yfiN-yfp</i>                                   | This study            |
| pBAD30- <sup>S</sup> FtsA <sub>CFP</sub>        | P <sub>BAD</sub> :: <sup>S</sup> <i>ftsA-cfp</i>                                   | This study            |
| pBAD33- <sup>S</sup> SulA                       | P <sub>BAD</sub> :: <sup>S</sup> <i>sulA</i>                                       | This study            |
| pBAD30- <sup>S</sup> CFP <sub>FtsN</sub>        | P <sub>BAD</sub> :: <sup>S</sup> <i>cfp-sftsN</i>                                  | This study            |
| pBAD30- <sup>E</sup> YfiN <sub>GFP</sub>        | P <sub>BAD</sub> :: <sup>E</sup> <i>yfiN-gfp</i>                                   | This study            |
| pUT18                                           | P <sub>lac</sub> :: <i>T18</i> ; Amp <sup>R</sup>                                  | (7)                   |
| pUT18C                                          | P <sub>lac</sub> :: <i>T18</i> -; Amp <sup>R</sup>                                 | (7)                   |
| pKNT25                                          | P <sub>lac</sub> :: <i>T25</i> ; Kan <sup>R</sup>                                  | (7)                   |
| pUT18- <i>zip</i>                               | P <sub>lac</sub> :: leucine zipper region from yeast GCN4- <i>T18</i>              | (7)                   |
| pKNT25- <i>zip</i>                              | P <sub>lac</sub> :: leucine zipper region from yeast GCN4- <i>T25</i>              | (7)                   |
| pUT18- <sup>E</sup> YfiN                        | P <sub>lac</sub> :: <sup>E</sup> <i>yfiN-T18</i>                                   | This study            |

|                                                 |                                                                |            |
|-------------------------------------------------|----------------------------------------------------------------|------------|
| pUT18- <sup>E</sup> FtsZ                        | P <sub>lac</sub> :: <sup>E</sup> <i>ftsZ-T18</i>               | This study |
| pUT18- <sup>E</sup> FtsA                        | P <sub>lac</sub> :: <sup>E</sup> <i>ftsA-T18</i>               | This study |
| pUT18- <sup>E</sup> ZipA                        | P <sub>lac</sub> :: <sup>E</sup> <i>zipA-T18</i>               | This study |
| pKNT25- <sup>E</sup> YfiN                       | P <sub>lac</sub> :: <sup>E</sup> <i>yfiN-T25</i>               | This study |
| pUT18C- <sup>E</sup> MreB                       | P <sub>lac</sub> :: <sup>E</sup> <i>T18-mreB</i>               | This study |
| pBAD33- <sup>E</sup> YfiN(GGAAF) <sub>GFP</sub> | P <sub>BAD</sub> :: <sup>E</sup> <i>yfiN (D329A E330A)-gfp</i> | This study |
| pTrc99A-DgcA                                    | P <sub>trc</sub> :: <i>dgcA</i> (amplified from pAB551)        | This study |
| pUT18- <sup>E</sup> YfiN(GGAAF)                 | P <sub>lac</sub> :: <sup>E</sup> <i>yfiN (D329A E330A)-T18</i> | This study |
| pBAD30-DgcA                                     | P <sub>BAD</sub> :: <i>dgcA</i>                                | This study |
| pBAD33-DgcA                                     | P <sub>BAD</sub> :: <i>dgcA</i>                                | This study |
| pBAD33- <sup>E</sup> YfiN <sub>GFP</sub>        | P <sub>BAD</sub> :: <sup>E</sup> <i>yfiN-gfp</i>               | This study |
| pTrc99A- <sup>E</sup> YfiR                      | P <sub>trc</sub> :: <sup>E</sup> <i>yfiR</i>                   | This study |
| pJN105- <sup>P</sup> YfiN <sub>GFP</sub>        | P <sub>BAD</sub> :: <sup>P</sup> <i>yfiN-gfp</i>               | This study |
| pBAD30- <sup>P</sup> YfiN <sub>GFP</sub>        | P <sub>BAD</sub> :: <sup>P</sup> <i>yfiN-gfp</i>               | This study |
|                                                 |                                                                |            |
| <b>Phage</b>                                    |                                                                |            |
| P22                                             | HT12/4int103                                                   | (1)        |

## References

1. **Mariconda S, Wang Q, Harshey RM.** 2006. A mechanical role for the chemotaxis system in swarming motility. *Mol Microbiol* **60**:1590-1602.
2. **Wang Q, Mariconda S, Suzuki A, McClelland M, Harshey RM.** 2006. Uncovering a large set of genes that affect surface motility in *Salmonella enterica* serovar Typhimurium. *J Bacteriol* **188**:7981-7984.
3. **Yu XC, Margolin W.** 2000. Deletion of the min operon results in increased thermosensitivity of an *ftsZ84* mutant and abnormal FtsZ ring assembly, placement, and disassembly. *J Bacteriol* **182**:6203-6213.
4. **Geissler B, Elraheb D, Margolin W.** 2003. A gain-of-function mutation in *ftsA* bypasses the requirement for the essential cell division gene *zipA* in *Escherichia coli*. *Proc Natl Acad Sci U S A* **100**:4197-4202.
5. **Pichoff S, Lutkenhaus J.** 2002. Unique and overlapping roles for ZipA and FtsA in septal ring assembly in *Escherichia coli*. *EMBO J* **21**:685-693.
6. **Baba T, Ara T, Hasegawa M, Takai Y, Okumura Y, Baba M, Datsenko KA, Tomita M, Wanner BL, Mori H.** 2006. Construction of *Escherichia coli* K-12 in-frame, single-gene knockout mutants: the Keio collection. *Mol Syst Biol* **2**:2006 0008.
7. **Karimova G, Pidoux J, Ullmann A, Ladant D.** 1998. A bacterial two-hybrid system based on a reconstituted signal transduction pathway. *Proc Natl Acad Sci U S A* **95**:5752-5756.
8. **Datsenko KA, Wanner BL.** 2000. One-step inactivation of chromosomal genes in *Escherichia coli* K-12 using PCR products. *Proc Natl Acad Sci U S A* **97**:6640-6645.
9. **Guzman LM, Belin D, Carson MJ, Beckwith J.** 1995. Tight regulation, modulation, and high-level expression by vectors containing the arabinose PBAD promoter. *J Bacteriol* **177**:4121-4130.
10. **Amann E, Brosius J, Ptashne M.** 1983. Vectors bearing a hybrid *trp-lac* promoter useful for regulated expression of cloned genes in *Escherichia coli*. *Gene* **25**:167-178.
11. **Newman JR, Fuqua C.** 1999. Broad-host-range expression vectors that carry the L-arabinose-inducible *Escherichia coli* *araBAD* promoter and the *araC* regulator. *Gene* **227**:197-203.
12. **Steiner S, Lori C, Boehm A, Jenal U.** 2013. Allosteric activation of exopolysaccharide synthesis through cyclic di-GMP-stimulated protein-protein interaction. *EMBO J* **32**:354-368.
